1 **Landscape of immune-related signatures induced by targeting of**

2 **different epigenetic regulators in melanoma: implications for immunotherapy.**

3  
4 Andrea Anichini<sup>1</sup>, Alessandra Molla<sup>1</sup>, Gabriella Nicolini<sup>1</sup>, Valentina E. Perotti<sup>1</sup>, Francesco  
5 Sgambelluri<sup>1</sup>, Alessia Covre<sup>2,3</sup>, Carolina Fazio<sup>2</sup>, Maria Fortunata Lofiego<sup>2</sup>, Anna Maria di Giacomo<sup>2,3</sup>,  
6 Sandra Coral<sup>2</sup>, Antonella Manca<sup>4</sup>, Maria Cristina Sini<sup>4</sup>, Marina Pisano<sup>4</sup>, Teresa Noviello<sup>5,6</sup>,  
7 Francesca Caruso<sup>5,6</sup>, Silvia Brich<sup>7</sup>, Giancarlo Pruneri<sup>7,8</sup>, Andrea Maurichi<sup>9</sup>, Mario Santinami<sup>9</sup>,  
8 Michele Ceccarelli<sup>5,6</sup>, Giuseppe Palmieri<sup>4,10</sup>, Michele Maio<sup>2,3\*</sup>, Roberta Mortarini<sup>1\*</sup>

9  
10 On behalf of the **EPigenetic Immune-oncology Consortium AIRC (EPICA)** investigators.

11  
12 <sup>1</sup>Human Tumors Immunobiology Unit, Dept. of Research, <sup>7</sup>Department of Pathology and  
13 Laboratory Medicine, <sup>9</sup>Melanoma and Sarcoma Unit, Department of Surgery, Fondazione IRCCS  
14 Istituto Nazionale dei Tumori, Milan, Italy. <sup>2</sup>Center for Immuno-Oncology, University Hospital of  
15 Siena, Siena, Italy. <sup>3</sup>University of Siena, Siena, Italy. <sup>4</sup>Unit of Cancer Genetics, National Research  
16 Council (CNR), Sassari, Italy. <sup>10</sup>University of Sassari, Sassari, Italy. <sup>5</sup>Department of Electrical  
17 Engineering and Information Technology (DIETI), University of Naples "Federico II", Naples, Italy.  
18 <sup>6</sup>BIOGEM Institute of Molecular Biology and Genetics, Ariano Irpino, Italy. <sup>8</sup>University of Milan,  
19 School of Medicine, Italy.

20 \*These authors contributed equally.

21  
22 **Running title:** epigenetic drug-mediated immunomodulation in melanoma.

23 **Keywords:** melanoma, epigenetic drugs, immune-related signatures, guadecitabine, innate  
24 immunity.

25 **Correspondence:** Andrea Anichini, PhD, Human Tumors Immunobiology Unit, Dept. of Research,  
26 Fondazione IRCCS Istituto Nazionale dei Tumori, Via Venezian 1, 20133 Milan, Italy.

27 Phone+390223902817. e-mail: [andrea.anichini@istitutotumori.mi.it](mailto:andrea.anichini@istitutotumori.mi.it).

28 **Abstract**

29 **Background.** Innovative cancer immunotherapy approaches aim at combining immune  
30 checkpoint inhibitors with other immunomodulatory agents. Epigenetic regulators can control  
31 immune-related genes, therefore targeting them with specific inhibitors may be a potential way  
32 forward. Here we identified immune-related signatures induced by four classes of epigenetic drugs  
33 in human melanoma cells to define the most promising agent and to understand its biological  
34 activity in-vitro, in-vivo and in clinical samples.

35 **Methods.** Human melanoma cell lines were characterized for mutational and  
36 differentiation profile and treated with inhibitors of DNA methyltransferases (guadecitabine),  
37 histone deacetylases (givinostat), bromodomain and extraterminal domain proteins (JQ1 and OTX-  
38 015) and enhancer of zeste homolog 2 (GSK126). Drug-specific gene signatures were identified by  
39 Clariom S and Nanostring platforms. Modulation of 14 proteins was determined by quantitative  
40 western blot. Ingenuity Pathway Analysis (IPA) identified Upstream Regulator (UR) molecules  
41 explaining changes in gene expression and biological activity of drugs. Gene set enrichment and  
42 IPA were used to test modulation of guadecitabine-specific gene and UR signatures, respectively,  
43 in on-treatment tumor biopsies from melanoma patients enrolled in the Phase Ib NIBIT-M4  
44 Guadecitabine + Ipilimumab Trial.

45 **Results.** Drug-specific gene and UR signatures were identified for each of the four  
46 inhibitors. Immune-related genes were frequently upregulated by guadecitabine, to a lesser  
47 extent by givinostat, but downregulated by JQ1 and OTX-015. GSK126 was the least active drug.  
48 Treatment of melanoma cells with combination of two epigenetic drugs revealed a dominant  
49 effect of guadecitabine and JQ1 on immune-related gene modulation. Drug-specific modulatory  
50 profiles were confirmed at the protein level. The guadecitabine-specific UR signature was  
51 characterized by activated molecules of the TLR, NF- $\kappa$ B, and IFN innate immunity pathways and  
52 was induced in drug-treated melanoma, mesothelioma, hepatocarcinoma cell lines and human

53 melanoma xenografts. Most of the guadecitabine-specific signature genes (n>160) were  
54 upregulated in on-treatment tumor biopsies from NIBIT-M4 trial. Progressive activation of  
55 guadecitabine UR signature molecules was observed in on-treatment tumor biopsies from  
56 responding compared to non-responding patients.

57 **Conclusions.** Guadecitabine was the most promising immunomodulatory agent among  
58 those investigated. This DNA methyltransferases inhibitor emerged as a strong inducer of innate  
59 immunity pathways, supporting the rationale for its use in combinatorial immunotherapy  
60 approaches.

61

62

63

64

65

66

67

68

69

70

71

72

73

74

75            **Introduction**

76            Following the approval 10 years ago of the anti-CTLA-4 antibody ipilimumab for treatment  
77 of metastatic melanoma [1], the management of an increasing spectrum of solid tumors has been  
78 revolutionized by the introduction of immunotherapy based on immune checkpoint inhibitors  
79 (ICI). Antibodies targeting CTLA-4 or the PD-1/PD-L1 axis have been approved for the treatment of  
80 19 cancer types and two tissue-agnostic conditions [2]. A recent meta-analysis on 23,760 patients  
81 and 37 Phase II/III trials, has shown that ICI immunotherapy provides a survival advantage  
82 compared to control treatments irrespective of age, sex and ECOG performance status [3]. In spite  
83 of these remarkable clinical achievements, only a fraction of patients obtains durable complete  
84 responses, even in the most responsive tumor types, and both intrinsic and acquired resistance to  
85 ICI is frequent [4]. Therefore, there is an urgent need to design improved immunotherapy  
86 approaches. One of the options being tested in early Phase I/II trials is the association of ICIs with  
87 immunomodulatory drugs [5,6]. In support of these combinatorial immunotherapy approaches,  
88 the recently completed Italian Network for Tumor Biotherapy (NIBIT) Phase Ib NIBIT-M4 trial [6],  
89 based on the association of ipilimumab with guadecitabine in advanced melanoma, has shown  
90 significant tumor immunomodulatory effects and preliminary evidence of promising clinical  
91 activity.

92            Inhibitors targeting molecules involved in epigenetic regulation have attracted  
93 considerable interest in the field of immuno-oncology, as several of these drugs have immune-  
94 related effects on tumor cells, as well as on immune cells, that could potentially synergize with ICI  
95 [5, 7, 8]. A large series of preclinical studies has shown that epigenetic drugs targeting DNA  
96 methyl transferases (DNMT), histone deacetylases (HDAC), enhancer of zeste homolog 2 (EZH2),  
97 bromodomain and extra-terminal domain (BET) proteins, and lysine-specific demethylase 1 (LSD-  
98 1), when combined with ICI, can contribute to the overall anti-tumor efficacy of immunotherapy,

99 by affecting the structure of the tumor immune landscape, the generation of anti-tumor  
100 immunity, and by modulating immunosuppressive mechanisms and immune escape processes [5,  
101 7, 8]. On the other hand, neither single epigenetic drugs, nor any class of drugs targeting  
102 epigenetic regulators, can elicit all of these immunomodulatory effects. Instead, there is a  
103 prominent drug-related specificity. For example, DNMT inhibitors can prevent T cell exhaustion  
104 [9], activate the interferon response pathway [10], rescue cGAS and STING gene expression [11]  
105 and improve antigen processing and presentation [12]. HDAC inhibitors, alone or in association  
106 with DNMT inhibitors, can promote T cell recruitment at tumor site [13, 14], reprogram tumor  
107 associated macrophages and reduce frequency/suppressive function of Tregs and MDSCs [15, 16].  
108 EZH2 inhibitors can rescue MHC class I transcription [17] and counteract melanoma  
109 dedifferentiation [18]. BET inhibitors can downregulate PD-L1 expression [19] and maintain CD8<sup>+</sup> T  
110 stem cell memory and T central memory differentiation states [20].

111 The emerging picture is a heterogeneous landscape of diverse and sometimes opposite  
112 immune-related activities on either tumors or the tumor microenvironment, or both, by different  
113 classes of epigenetic drugs [21, 22]. This immunomodulatory complexity contributes to explain  
114 why early combination immunotherapy trials are not focusing on a single epigenetic drug or a drug  
115 class. In fact, among >80 recently reviewed Phase I/II combination immunotherapy trials, 15  
116 different inhibitors directed at five classes of epigenetic targets are being tested in association  
117 with 9 different ICI [5].

118 To foster progress in the field of epigenetic immuno-modulation here we carried out a  
119 comparative profiling of signatures induced by four epigenetic drugs representing the classes of  
120 DNMT, HDAC, BET and EZH2 inhibitors and tested in the melanoma context, a tumor type  
121 currently treated by immunotherapy. We defined the breadth of drug-specific immune-related  
122 signatures in neoplastic cells fully characterized for genetic background and differentiation profile.

123 We found that guadecitabine is a strong immunomodulatory agent promoting activation of innate  
124 immunity pathways both in-vitro and in-vivo in patients treated with this DNMT inhibitor.

125

126

127

128

129

130

131

132

133

134

135

136

137

138

139

140

141

142

143

144

145

146

147

## 148 **Materials and Methods**

149 **Melanoma cell lines.** Melanoma cell lines (n=14) were established, maintained and  
150 routinely tested for the absence of mycoplasma contamination by PCR, as previously described  
151 [23]. Origin of the cell lines from primary lesions (n=1) or from metastases (n=13),  
152 histopathological features of the corresponding primary melanoma, cell line authentication by STR  
153 profiling (Gene-Print10 kit, Promega) and mutational profile by targeted NGS are described in  
154 Table S1A-D. The melanoma cell lines were representative of the main molecular subtypes:  
155 BRAF<sup>mut</sup>/NRAS<sup>wt</sup> (n=10), BRAF<sup>wt</sup>/NRAS<sup>mut</sup> (n=3), and BRAF<sup>wt</sup>/ NRAS<sup>wt</sup> (n=1). Expression in n=10  
156 melanoma cell lines of the genes targeted by epigenetic drugs (Fig. S1) was evaluated as described  
157 in Supplementary Methods. Mesothelioma cell lines (MPP-89, MM98 and MES2a) were obtained  
158 from pleural effusion of mesothelioma patients, cultured, and treated with guadecitabine as  
159 previously described [24].

160 **Epigenetic drugs and treatments.** Melanoma cell lines were treated with the following  
161 drugs: the DNMT inhibitors Decitabine (Selleckchem) and Guadecitabine (MedChemExpress LLC),  
162 the HDAC inhibitor Givinostat (ITF-2357, Selleckchem), the BET inhibitors JQ-1 (Selleckchem) and  
163 OTX015 (Selleckchem), the EZH2 inhibitor GSK-126 (Selleckchem), and the CDK4/6 inhibitor  
164 Abemaciclib (Selleckchem). Susceptibility of ten melanoma cell lines to a range of doses between  
165 7.8 and 3,000 nM of all the drugs was assessed by the 3-(4,5)dimethylthiazol-2,5-  
166 diphenyltetrazolium bromide (MTT) assay at 96h as described [25]. On the basis of the dose-  
167 response curves, drug doses for all subsequent experiments were tailored for each cell line and for  
168 each drug to achieve, in all instances, a response >60% of control in the MTT assay (Table S2A, B).  
169 For all subsequent assays, melanoma cells were seeded at  $1.25 \times 10^4$ /mL in T75 flasks (Greiner Bio-  
170 One) with RPMI-1640 medium (Life Technologies Limited) supplemented with 4% FCS (Biological  
171 Industries) without antibiotics. Since the activity of epigenetic drugs is coupled to cell proliferation  
172 [26], melanoma cells were treated twice with each drug (at T=24h and T=72h) and then evaluated

173 at T=144h. For some experiments melanoma cells were treated with all possible combinations of  
174 two out of the four epigenetic drugs.

175 **NGS analysis.** DNA was extracted from 0.5-1x10<sup>6</sup> melanoma cell lines by Purelink Genomic  
176 DNA Mini Kit (Invitrogen). RNase treatment was carried out by RNase cocktail (Invitrogen).  
177 Quantitative assessment of DNA was performed by a Nanodrop 2000 spectrophotometer and DNA  
178 integrity was confirmed by gel electrophoresis. Next generation sequencing (NGS) assays on cell  
179 lines DNA were done as described in Supplementary Methods.

180 **RNA extraction and gene expression analysis.** RNA was extracted from melanoma cell lines  
181 by TRIzol (Thermo Fisher Scientific). Melanin removal was carried out by the CTAB-UREA method  
182 [27]. Samples were treated with DNase (Qiagen) and purified by RNeasy MinElute Cleanup Kit  
183 (Qiagen). The quality of total RNA was first assessed using the RNA 6000 Pico Assay RNA chips run  
184 on an Agilent Bioanalyzer 2100 (Agilent Technologies). RNA was also extracted from tumor  
185 nodules previously obtained from immunodeficient mice treated or not with guadecitabine and  
186 bearing human melanoma cell line 195 xenografts [28, 29]. Gene expression analysis was  
187 performed as described in Supplementary Methods.

188 **Quantitative Western blot.** SDS-PAGE was performed with 30 µg of protein lysate on 4–  
189 12% NuPAGE Bis-Tris (Thermo Fisher Scientific), in MOPS buffer as described [23]. Primary  
190 antibodies (Table S3) were diluted in milk 5% or BSA 5% in TBST as described [23] and incubated  
191 overnight. Development was performed with the ECL normal western blot detection system by the  
192 chemiluminescence method. Images were acquired with the Alliance Imaging System (Uvitec).  
193 Densitometric analysis was carried out by Quantity One software (Bio-Rad Laboratories Inc.).  
194 Normalized treated/control ratios were computed on the basis of background-adjusted density  
195 values and then visualized by a color code.

196 **Data analysis.** The Transcriptomics Analysis Console (TAC) software (Applied Biosystems)  
197 was used to identify significantly modulated genes by treatment of two melanoma cell lines



198 (VRG100 and CST30) treated with Guadecitabine, Givinostat, JQ1, OTX-015, GSK126 or  
199 Abemaciclib, and of melanoma nodules removed from immunodeficient mice treated with  
200 Guadecitabine. Analysis settings were as follows: gene level fold change  $>|1.2|$ , gene-level p  
201 value:  $<0.05$ ; gene-level FDR:  $<0.05$ . Nanostring data were analyzed with nSolver software 4.0  
202 (Nanostring Technologies) as described in Supplementary Methods. VENNTURE software [30],  
203 allowing Edwards-Venn diagram generation for multiple dataset analysis, was used to classify all  
204 genes with significant modulation by any of the treatments. Ingenuity Pathway Analysis (IPA 8.5,  
205 [www.ingenuity.com](http://www.ingenuity.com)) was used, as described in Supplementary Methods, to carry out Upstream  
206 Regulator (UR) analysis on: a) significantly modulated genes by different treatments; b)  
207 differentially expressed genes in pre-therapy and on-treatment lesions from responding vs non  
208 responding patients from the NIBIT-M4 trial [6]. IPA was also used for canonical pathway analysis  
209 as described in Supplementary Methods. RNA-seq and DNA methylation data from tumor samples  
210 obtained at baseline (week 0), at week 4 and week 12 of treatment were retrieved from the  
211 published NIBIT M4 Phase Ib trial [6]. Raw data as FASTQ files of melanoma patient's biopsies  
212 were aligned to the human reference genome (GRCh38/hg38) using STAR version 2.7.0b [31] and  
213 the gene expression level was quantified using featureCounts version 1.6.3 [32]. Downstream  
214 analyses were performed in the R statistical environment. EDASeq package [33] was used to  
215 normalize the count matrix using GC-correction for the within normalization step and upper-  
216 quantile for the between phase. EdgeR package [34] was used to identify differentially expressed  
217 genes at week4 and week12 compared to week0 and at week12 compared to week4. The  
218 guadecitabine-specific gene signature (upregulated genes), identified in this manuscript, was used  
219 to construct a heatmap of the Log<sub>2</sub> fold changes for the three different comparisons.  
220 ClusterProfiler package [35] was used to perform and visualize GSEA pre-ranked analyses using the  
221 guadecitabine-specific gene signature in each comparison.

222

## 223 **Results**

224 **Epigenetic drugs modulate expression of 20 gene families.** A panel of melanoma cell lines  
225 was fully characterized for tissue of origin (Table S1A), expression of epigenetic drug targets (Fig.  
226 S1), mutational profile (Table S1D), differentiation-related signatures (Fig. S2) as defined by Tsoi et  
227 al [36], as well as for susceptibility to four epigenetic drugs (Fig. S3 and Table S2A, B). Two of  
228 these cell lines (VRG100 and CST30) were selected as examples of divergent transcriptomic  
229 profiles found in melanoma (Fig. S4). Gene modulation in these two lines by DNMT  
230 (decitabine/guadecitabine), HDAC (givinostat), BET (JQ1) and EZH2 (GSK126) inhibitors was  
231 investigated by whole genome gene expression analysis. The CDK4/6 inhibitor abemaciclib, a drug  
232 with immunomodulatory activity unrelated to epigenetic regulation [37], was also included in  
233 these experiments. The five drugs modulated 6% to >30% of the genes in the two cell lines (Fig. S5)  
234 and, based on Edwards-Venn diagrams [30], showed both drug-specific as well as shared  
235 modulatory activities (Fig. S6). Guadecitabine, givinostat, JQ1, GSK-126 and abemaciclib exerted  
236 pleiotropic modulatory activities on 20 gene families grouped into 7 biological functions (Fig. 1),  
237 including epigenetic regulation, proliferation, immune regulation, enzymatic activity, structural  
238 function, adhesion and cellular differentiation. The drugs elicited variable modulatory activity on  
239 epigenetic regulator genes (DNMT, HDAC, BET and PRC2 components), and on genes encoding  
240 histones and nuclear pore complex interacting proteins (NPIPA genes). Guadecitabine, givinostat  
241 and JQ1 were the most active drugs, followed by GSK-126, in modulation of genes encoding HLA-  
242 I/II and antigen processing machinery (APM) components, heat shock proteins, IFN (IFI and IRF),  
243 TNF/TNFR and TGF $\beta$  pathways. These immune-related genes were frequently upregulated by  
244 guadecitabine and givinostat, but downregulated by JQ1 (Fig. 1).

245 **Guadecitabine is the most active drug in upregulation of immune-related genes, while**  
246 **JQ1 is a strong suppressor of immune-related gene expression.** Immunomodulation emerged as a  
247 dominant feature of the epigenetic drugs in the two cell lines VRG100 and CST30. Therefore, we

248 focused on the quantitative determination of 731 immune-related genes, present in the  
249 Nanostring Cancer Immune panel and re-classified by us into 21 functional classes (Fig. S7). In  
250 these experiments we used the whole panel of melanoma cell lines. Quantitative analysis (Fig. S8)  
251 and hierarchical clustering of Nanostring data, according to the 21 functional classes (Fig. S9),  
252 indicated that guadecitabine and givinostat had a predominantly positive effect on immune-  
253 related gene expression, while JQ1 induced frequent gene downmodulation. To reduce the  
254 complexity emerging from the gene-level analysis (shown in Table S4) of the modulatory effects of  
255 all drugs on the 21 functional classes, we used *ad-hoc* developed metrics. This approach (Fig. 2)  
256 allowed to visualize the proportion of genes being significantly modulated in each gene class and  
257 the direction of the most frequent effects by each drug (in terms of up- or down-regulated genes).  
258 Guadecitabine and givinostat mostly induced upregulation of immune-related genes in the  
259 majority of the cell lines, while the BET inhibitor JQ1 produced the opposite effects (Fig. 2).  
260 GSK126 and abemaciclib were the least active drugs and also showed cell line-specific effects.  
261 Immune-related gene modulation by the three most active drugs was observed across the  
262 melanoma cell line panel without any clear association with the mutational or differentiation  
263 profile of the cell lines (Fig. 2). Two of the cell lines (BNV13 and GRD43) were treated with  
264 decitabine, the active metabolite of guadecitabine, yielding similar results to the cell lines treated  
265 with guadecitabine (Fig. 2). Guadecitabine was the most active drug in upregulation of genes  
266 belonging to the following functional classes: cancer testis, adhesion molecules, positive/negative  
267 co-stimulation, myeloid-related, cytokines and receptors, T/NK related, immune cell  
268 lineage/differentiation, regulation of inflammation, TNF/TNFR pathway, Type I-II-III IFN pathways  
269 and intracellular signaling (Fig. 2 and Table S4 for gene level analysis). The BET inhibitor JQ1 was  
270 the most active drug in inducing downregulation of selected genes related to immune cells  
271 lineage/differentiation markers, TNF/TNFR pathway, Type I-II-III IFNs pathways, intracellular  
272 signaling and transcriptional regulation, TLR pathway, HLA Class I/II and antigen presentation

273 pathways (Fig. 2 and Table S4 for gene-level analysis). Nanostring analysis of a subset of six cell  
274 lines treated with a different BET inhibitor (OTX-015), tested in clinical trials [38], confirmed the  
275 predominant down-modulation of immune-related genes by this class of epigenetic drugs (Fig.  
276 S10).

277 By exploiting Nanostring data from all cell lines we derived all the epigenetic drug-specific  
278 gene signatures listing the most frequently modulated genes (Fig. S11). The guadecitabine-specific  
279 and the JQ1-specific gene signatures contained each ~170 genes, mostly being upregulated by the  
280 former drug while being downregulated by the latter. The givinostat-specific gene signature  
281 contained 128 genes (several shared with the guadecitabine signature) while the GSK126 signature  
282 contained 40 genes (Fig S11).

283 **Combinatorial treatments with epigenetic drugs indicate a dominant effect of**  
284 **guadecitabine and JQ1 on immune-related gene modulation.** Melanoma cells from the panel  
285 were treated with all six binary combinations of the four epigenetic drugs (guadecitabine +  
286 givinostat, guadecitabine + JQ1, guadecitabine + GSK126, givinostat + JQ1, givinostat + GSK126,  
287 JQ1 + GSK126). Gene modulation induced by the combinations was then measured by Nanostring  
288 Cancer Immune panel and compared to the effects of single drugs (Table S5). In most instances,  
289 combinatorial treatments did not enhance gene modulation compared to single treatments.  
290 Moreover, the effect of a “dominant” drug was evident. In fact, association of guadecitabine with  
291 givinostat or with GSK-126 replicated the pattern of immune-related gene upregulation exerted by  
292 guadecitabine alone (Table S5). Similarly, any association of JQ1 with the other drugs replicated  
293 the dominant suppressive effect on immune-related gene expression exerted by JQ1 alone (Table  
294 S5). These results argue against the possibility of achieving more effective modulation of immune-  
295 related genes by combining two epigenetic drugs belonging to different classes.

296 **Immune-related genes modulated by guadecitabine belong to the “low expression/high**  
297 **methylation” class.** Guadecitabine is expected to induce upregulation of genes subjected to  
298 negative regulation by promoter methylation [39]. Therefore genes in the guadecitabine signature  
299 should be characterized by high levels of methylation and low expression. To test this hypothesis,  
300 we retrieved data on gene expression and DNA methylation of a large set of melanoma cell lines  
301 from the CellMinerCDB database [40]. We defined a gene expression/methylation classification in  
302 4 subsets (a,b,c and d in Fig. S12A-C) by setting appropriate methylation and expression  
303 thresholds. Then this classification was extended to all the genes in the guadecitabine-specific  
304 signature (Fig. S13). We found that most of them were indeed characterized by high methylation  
305 and low expression in most cell lines, namely they belong to group b). We then retrieved gene-  
306 specific methylation and gene expression data previously obtained on tumor samples obtained at  
307 week 0 (baseline, w0), at week 4 (w4) and week 12 (w12) in the context of the guadecitabine +  
308 ipilimumab NIBIT-M4 clinical trial [6]. We focused on the subset of the cancer testis (CT) genes ,  
309 that can be modulated by guadecitabine and that have tumor-restricted expression [41]. By  
310 adopting a scoring system described in Fig. S14 A, B, we found frequent increased expression of CT  
311 genes associated with reduction of their methylation level in tumor samples obtained at w4 and  
312 w12 of treatment, compared to w0 biopsies (Fig. S14C).

313 **Epigenetic drugs modulate expression of immune-related proteins in melanoma.** The  
314 immuno-related activity of the epigenetic drugs was assessed by quantitative Western blot  
315 analysis (pipeline of data analysis and visualization described in Fig. S15 and Fig. S16) by looking at  
316 expression and modulation of 14 immune-related and differentiation-related proteins in 11  
317 melanoma cell lines (Fig. 3). Guadecitabine, followed by givinostat and GSK-126, were the most  
318 active drugs in increasing expression of HLA class I and II-related proteins (HLA Class I heavy chain,  
319 B2M and HLA-DR), but guadecitabine was more active compared to givinostat and to GSK-126 on  
320 molecules belonging to the antigen processing and presentation pathway (TAP1, TAP2,

321 LMP2/PSMB9, Fig. 3). In contrast, the two BET inhibitors induced, in most instances, a reduction of  
322 expression of these classes of proteins. Guadecitabine and the BET inhibitors confirmed their  
323 opposite effects on expression of IFN-pathway related proteins (OAS3 and IFITM1), on PD-L1 /  
324 CD274 and on CEACAM1. Interestingly, all the 5 epigenetic drugs had a predominant inhibitory  
325 effect on expression of melanoma differentiation-related proteins MITF and SOX-10 and of the  
326 transcription factor MYC (Fig. 3).

327 **Upstream Regulator (UR) analysis identifies activation of innate immunity and of**  
328 **inflammation-related pathways as the main immune-related activity of guadecitabine.** To gain  
329 insight into the biological activity of the different epigenetic agents we used UR analysis, by IPA.  
330 UR analysis (pipeline of data analysis described in Fig. S17) is a computational tool that identifies  
331 the upstream transcriptional regulators that control downstream genes and explain the observed  
332 gene expression changes in the dataset. UR analysis also predicts the functional status (activated  
333 or inhibited) of each UR molecule. Each of the predicted UR can be associated with the main  
334 cellular processes and pathways it belongs, thus allowing to improve understanding of the overall  
335 biological activity of each drug (Fig. S17).

336 UR analysis, based on p values and activation Z scores (Table S6) and applied to gene  
337 expression dataset of cell lines VRG100 and CST30, confirmed the wide range of biological  
338 activities of all drugs. Several of the significant URs were molecules involved in immune-regulation  
339 (highlighted in green in Table S6). These UR molecules were often predicted to be activated by  
340 guadecitabine, and to a lesser extent by givinostat, but frequently inhibited by JQ1 or by GSK126.  
341 To provide a direct comparison of all drugs at the UR level, significantly modulated URs by at least  
342 two different inhibitors were grouped and visualized according to 18 functional groups (Fig. S18  
343 and Fig. S19 dealing with cell lines VRG100 and CST30, respectively). This analysis revealed not  
344 only the breadth and drug-related specificity of epigenetic drug activity, but even the differences

345 among these drugs (i.e. the UR with opposite activation status). A large set of these URs (group 12  
346 in Fig. S18 and group 14 in Fig. S19) were immunity/inflammation-related molecules belonging to  
347 at least seven functional groups/pathways (cytokines, IFNs, JAK-STAT, IRFs, TLR, NF-kB, TNF)  
348 frequently activated by guadecitabine, and to a lesser extent by givinostat, while almost invariably  
349 predicted to be inhibited by JQ1. Scatter plots of significantly modulated URs by guadecitabine vs  
350 JQ1, in cell line VRG100, confirmed the opposite biological activity of these two drugs (Fig. S20A).  
351 In fact, a large set of URs activated by guadecitabine were inhibited by JQ1. In contrast, scatter  
352 plots comparing URs modulated by guadecitabine and givinostat revealed a set of URs activated by  
353 both drugs, as well as URs activated only by guadecitabine (Fig. S20B).

354 The UR analysis was then extended to the whole panel of cell lines using Nanostring data as  
355 input and by focusing on the activity of guadecitabine. By such analysis we identified 51 activated  
356 URs (z score >2) and 9 inhibited URs (Z score <-2) by guadecitabine in the majority of cell lines (i.e.  
357  $\geq 6/10$  cell lines, Fig. 4A). Additional 36 URs were predicted to be activated in a subset of the cell  
358 lines (i.e. 5/10 cell lines, Fig. 4B). To visualize the overall biological activity of guadecitabine the  
359 URs were labeled with color-coded arrows pointing to the pathways/biological processes these  
360 molecules belong. On this basis, the main immune-related activity of guadecitabine could be  
361 summarized as an activator of innate immunity (NF-kB, TLR and Type I-III IFN) and inflammation-  
362 related pathways (Fig. 4A, B).

363 We then tested whether the guadecitabine-specific UR signature could be induced by this  
364 drug in different cellular contexts, beyond the melanoma histotype, as well as in tumor nodules  
365 from a previously described [28,29] in-vivo model. By gene expression analysis in mesothelioma  
366 cell lines treated with guadecitabine and by retrieving published gene expression data of  
367 hepatocarcinoma cell lines treated with this drug [42], we found that guadecitabine-specific UR  
368 signature molecules were predicted to be activated (color-coded dots in Fig. 5A, B). Several of the

369 guadecitabine-specific URs activated by this drug in-vitro in cell lines were also activated in-vivo in  
370 tumor nodules from immunodeficient mice bearing a human melanoma cell line xenograft [28,29]  
371 and treated with guadecitabine (Fig. S21A). In addition, canonical pathway analysis by IPA,  
372 indicated that several genes in the IFN- $\gamma$  and IFN- $\alpha/\beta$  pathways were significantly upregulated by  
373 guadecitabine in the tumor xenografts (Fig. S21B). Taken together, these results indicate that  
374 guadecitabine is a strong inducer of innate immunity pathways and that its biological function can  
375 be consistently detected not only in-vitro, irrespective of tumor mutational background and  
376 histotype, but even in-vivo.

377 **The guadecitabine-specific gene and UR signatures are induced in-vivo in on-treatment**  
378 **tumor biopsies from NIBIT-M4 patients.** Modulation of genes belonging to the guadecitabine-  
379 specific signature was investigated by retrieving RNA-seq data of pre-therapy (w0), and on-  
380 treatment (w4 and w12) melanoma biopsies from patients enrolled in the NIBIT-M4 trial [6].  
381 Different groups of guadecitabine-specific signature genes (highlighted by vertical color bars in Fig.  
382 6A) showed increased expression in w12 or w4 on-treatment samples compared to baseline or in  
383 w12 compared to w4 biopsies. Overall, almost 92% of the guadecitabine-specific signature genes  
384 were upregulated in biopsies obtained at w12 or w4, compared to w0 (Fig. 6A). By gene set  
385 enrichment analysis [43] the guadecitabine-specific gene signature showed a significant increase  
386 at w12 compared to w4 and w0, but not at w4 compared to w0 (Fig. 6B-D). We then asked  
387 whether treatment in monotherapy with the anti-CTLA-4 mAb could also lead to upregulation of  
388 most of the guadecitabine signature genes in on-treatment lesions. In two published datasets [44,  
389 45] involving n=45 [44] and n=54 melanoma patients [45], among 376 and 286 genes upregulated  
390 by Ipilimumab in on treatment lesions compared to baseline, we found only 35/166 (21.1%) and  
391 28/166 genes (16.9%) of the guadecitabine signature, respectively (data not shown).



392 We then identified genes showing differential expression, at each time point, in biopsies  
393 from responding vs non-responding patients of the NIBIT–M4 trial and then we subjected these  
394 differentially expressed genes to UR analysis by IPA. The results revealed progressive activation of  
395 several guadecitabine-specific UR signature molecules in on-treatment (w4 and w12) tumor  
396 biopsies from responding compared to non-responding patients (Fig. 7A, B), as well as a strong  
397 correlation of these activated UR at w4 vs w12 tumor samples (Fig. 7C).

398 Taken together these results strongly support the notion that the guadecitabine-specific  
399 gene signature defined in-vitro in melanoma cell lines can be modulated even in-vivo at tumor site  
400 in patients treated with this DNMT inhibitor. Moreover, the progressive activation of the UR  
401 signature in responding vs non responding patients suggests that the clinical activity of  
402 guadecitabine in melanoma patients depends on effective activation of innate immunity  
403 pathways.

404

405

406

407

408

409

410

411

412

413

414

415

## 416 **Discussion**

417           Characterization of the biological activity of the four investigated agents targeting distinct  
418 epigenetic regulators by gene expression, quantitative western blot and UR analyses in melanoma  
419 cell lines, indicated that the DNMT inhibitor guadecitabine and the BET inhibitor JQ1 were the  
420 most active drugs, but exerted opposite immuno-regulatory functions. Comparison of the drug-  
421 specific immune-related gene signatures indicated that guadecitabine upregulated several genes  
422 in each of the 21 functional classes present on the Nanostring Cancer Immune panel, while JQ1  
423 predominantly downregulated genes in such classes. Moreover, almost all immune-related URs  
424 predicted to be activated by guadecitabine were instead inhibited by JQ1 in the majority of the  
425 melanoma cell lines tested. Among UR predicted to be inhibited by JQ1 we found not only  
426 molecules belonging to the IFN-gamma pathway, known to be targeted by this BET inhibitor [46],  
427 but also molecules belonging to the TLR and NF-kb pathways regulated by the BET proteins [21].  
428 The experiments looking at gene modulation in melanoma cell lines, by treatment with  
429 combinations of two different epigenetic inhibitors, confirmed that the guadecitabine and JQ1  
430 were the dominant drugs that determined opposite responses to treatment, irrespective of the  
431 other drug used in the combination. Collectively, the results suggest that guadecitabine elicits  
432 marked pro-inflammatory effects, while JQ1 is mainly an anti-inflammatory drug.

433           The breadth of non-immuno-related effects of the four epigenetic inhibitors emerged  
434 through comparative transcriptomic analysis. The four drugs had a variable impact on expression  
435 of genes encoding DNMT, HDAC, histones, BET, and PRC2 components. This suggests that drug  
436 activity of these agents is not uniquely dependent on inhibition of their specific targets, but even  
437 on modulation of additional genes which contribute to different aspects of epigenetic regulation.  
438 The drugs affected also expression of genes encoding proteolytic enzymes (cathepsins), and their  
439 inhibitors (serpins), thus implicating epigenetic drugs in the regulation of different cancer-related  
440 processes, controlled by cathepsins, such as proliferation, angiogenesis, metastasis and invasion.

441 Taken together, these results significantly extend previous knowledge on non-immuno-related  
442 anti-tumor activities of epigenetic inhibitors, such as reactivation of tumor suppressor genes by  
443 demethylating agents [47], promotion of cell death and suppression of angiogenesis by HDAC  
444 inhibitors [48], inhibition of proto-oncogenes MYC and BCL2 by BET inhibitors [49] and  
445 downregulation of DNA repair genes by EZH2 inhibitors [50].

446 In depth analysis of guadecitabine biological activity indicated that this DNMT inhibitor  
447 upregulated genes belonging to 21 immune-related classes. The >160-gene drug-specific signature  
448 of guadecitabine and the related UR signature profiled the remarkable immunomodulatory activity  
449 of this drug. The emerging immune-related biological activity of guadecitabine, identified through  
450 UR analysis, was consistently observed across a panel of melanoma cells lines with widely  
451 divergent mutational and differentiation profiles, as well as across different tumor histotypes. A  
452 pre-clinical tumor model confirmed the activation of the guadecitabine-specific UR signature even  
453 in-vivo. Finally, we found that most of the guadecitabine-specific signature genes were  
454 upregulated at w4 or w12 in clinical samples from NIBIT-4 patients, but not in on treatment tumor  
455 samples from patients treated with Ipilimumab only [44-45]. Moreover, progressive activation of  
456 the guadecitabine-specific UR signature could distinguish on treatment tumor biopsies of  
457 responding compared to non-responding patients. These results suggest that the clinical efficacy  
458 of guadecitabine in melanoma patients is strictly associated with the effective promotion, in-vivo,  
459 of the innate immunity pathways that define the biological activity of this DNMT inhibitor.

460 In conclusions, the findings of this study support a mechanistic rationale for development  
461 of combinatorial immune intervention where boosting of NF-kB, TLR, Type I-III IFN and  
462 inflammation-related pathways by the DNMT inhibitor guadecitabine may cooperate with rescue  
463 of adaptive immunity by immune checkpoint blockade to improve efficacy of cancer  
464 immunotherapy.

465

466 **Abbreviations.**

467 APM: antigen processing machinery; BET: bromodomain and extra-terminal domain; CT: cancer  
468 testis; DNMT: DNA methyltransferases; EZH2: enhancer of zeste homolog 2; HDAC: histone  
469 deacetylases; ICI: immune checkpoint inhibitor; IPA: Ingenuity Pathway Analysis; LSD-1: Lysine-  
470 specific demethylase 1; MTT: 3-(4,5)dimethylthiazol-2,5-diphenyltetrazolium bromide; NIBIT:  
471 Italian Network for Tumor Biotherapy; NGS: next generation sequencing; TAC: Transcriptomic  
472 Analysis Console; UR: Upstream Regulator.

473

474 **Supplementary Information.**

475 **-Supplementary Methods and Figures.pdf.** This file contains supplementary materials and  
476 methods and supplementary figures S1 to S21. **-Fig. S1.** Expression in ten melanoma cell lines of  
477 genes and gene families targeted by epigenetic drugs. **-Fig. S2.** Melanoma differentiation profile  
478 of cell lines according to expression of seven subtype signatures and four main melanoma subsets.  
479 **-Fig. S3.** Susceptibility of ten melanoma cell lines to the anti-proliferative effects of epigenetic  
480 drugs. **-Fig. S4.** Volcano plot of differentially expressed genes in VRG100 and CST30 cell lines. **-Fig.**  
481 **S5.** Whole genome gene modulation analysis by epigenetic drugs in two melanoma cell lines. **-Fig.**  
482 **S6.** Edwards-VENN diagram analysis of significantly modulated genes. **-Fig. S7.** Original and  
483 revised gene classification of the NanoString nCounter PanCancer Immune Profiling panel. **-Fig.**  
484 **S8.** Quantitative analysis of Nanostring data in ten melanoma cell lines treated with epigenetic  
485 drugs. **-Fig. S9.** Modulation of immune-related genes in melanoma cell lines by epigenetic drugs.  
486 **-Fig. S10.** Comparison of immune-related gene modulation by BET inhibitors JQ1 and OTX-015. -  
487 **Fig. S11.** Immune-related signatures of epigenetic drugs in melanoma. **-Fig. S12.**  
488 Expression/methylation relationship, for selected genes in the guadecitabine-specific gene  
489 signature, among melanoma cell lines present in the GDSC-MGH Sanger database. **-Fig. S13.**  
490 Expression/methylation relationship of genes belonging to the guadecitabine-specific signature

20

491 according to the GDSC-MGH Sanger melanoma dataset. **-Fig. S14.** Changes in gene expression and  
492 gene methylation for the cancer testis class of genes in tumor biopsies from melanoma patients  
493 enrolled in the NIBIT-M4 trial. **-Fig. S15.** Outline of the strategy for quantitative analysis and  
494 visualization of western blot data. **-Fig. S16.** Quantitative western blot analysis and visualization  
495 of the modulation of LMP7 by epigenetic drugs in 11 melanoma cell lines. **-Fig. S17.** Pipeline of  
496 data analysis based on Upstream Regulators (UR) identified by IPA. **-Fig. S18.** Classification of URs  
497 significantly modulated by at least two different drugs in melanoma cell line VRG100. **-Fig. S19.**  
498 Classification of URs significantly modulated by at least two different drugs in melanoma cell line  
499 CST30. **-Fig. S20.** Comparison of all URs predicted to be activated or inhibited by Guadecitabine vs  
500 JQ1 and by Guadecitabine vs Givinostat. **-Fig. S21.** Comparison of URs activated by guadecitabine  
501 in-vitro and in-vivo.

502 **-Table S1.xlsx.** Origin of melanoma cell lines, histopathological features of the corresponding  
503 primary tumor, cell line authentication data by STR profiling, and mutational profile by NGS of 14  
504 melanoma cell lines used in this study.

505 **-Table S2.xlsx.** Drug doses used for experiments and effect of each drug at such dose in the MTT  
506 assay on each cell line.

507 **-Table S3.xlsx.** Antibodies used in quantitative western blot analysis.

508 **-Table S4.xlsx.** Modulation of immune-related genes belonging to 21 functional classes by  
509 epigenetic drugs. This excel file has 21 sheets.

510 **-Table S5.xlsx.** Immune-related gene modulation by epigenetic drugs and by combinatorial  
511 treatments. This excel file has 5 sheets.

512 **-Table S6.xlsx.** Upstream Regulator analysis on differentially expressed genes in drug-treated vs  
513 untreated cell lines VRG100 and CST30.

514

515

516 **Declarations**

517 **Ethics approval and consent to participate.** The data analyzed during this study concern gene  
518 expression and methylation in tumor samples from the published NIBIT-M4 trial [6]. The NIBIT-M4  
519 Phase Ib trial was conducted in accordance with the ethical principles of the Declaration of  
520 Helsinki and the International Conference on Harmonization of Good Clinical Practice. The  
521 protocol was approved by the independent ethics committee of the University Hospital of Siena  
522 (Siena, Italy). All participating patients (or their legal representatives) provided signed-informed  
523 consent before enrolment. The trial was registered with European Union Drug Regulating  
524 Authorities ClinicalTrials EudraCT, number 2015-001329-17, and with ClinicalTrials.gov, number  
525 NCT02608437.

526 **Consent for publication.** Not applicable.

527 **Availability of data and materials.** The datasets generated during the current study are available  
528 in the Gene Expression Omnibus (GEO) repository with the following GEO accession numbers:  
529 GSE189628, GSE189629, GSE189630, GSE189631. The data analyzed during this study concerning  
530 gene expression and methylation in tumor samples from patients enrolled in the published NIBIT-  
531 M4 trial were retrieved from ref. 6.

532 **Competing interests.** AA has received compensated educational activities from Bristol-Myers  
533 Squibb. AMDG has served as a consultant and/or advisor to Incyte, Pierre Fabre, Glaxo Smith Kline,  
534 Bristol-Myers Squibb, Merck Sharp Dohme, and Sanofi and has received compensated educational  
535 activities from Bristol Myers Squibb, Merck Sharp Dohme, Pierre Fabre and Sanofi. MM has served  
536 as a consultant and/or advisor to Roche, Bristol-Myers Squibb, Merck Sharp Dohme, Incyte,  
537 AstraZeneca, Amgen, Pierre Fabre, Eli Lilly, Glaxo Smith Kline, Sciclone, Sanofi, Alfasigma, and  
538 Merck Serono; and owns shares in Epigen Therapeutics. SC and AC own shares in Epigen  
539 Therapeutics. G.Palmieri has advisory role for Bristol-Myers Squibb, Merck Sharp Dohme, Roche,

540 Novartis, Pierre-Fabre, Incyte. A.Maurichi has received compensated educational activities from  
541 Novartis. G.Pruneri has received meetings honoraria from from AstraZeneca, Novartis, Exact  
542 Sciences, Roche and Illumina and is advisory board member of ADS Biotec. A.Molla, GN, VEP, FS,  
543 CF, MFL, A.Manca, MCS, MP, SB, TN,FC, MS and RM declare no conflicts of interests.

544 **Funding.** The research leading to these results has received funding from: AIRC under 5 per mille  
545 2018 – ID.21073 program – P.I. Maio Michele, Group Leader Anichini Andrea and Ministry of  
546 Health, Lombardy and Tuscany regions, Bando Ricerca Finalizzata, grant number NET-2016-  
547 02361632, P.I. Michele Maio.

548 **Authors' contributions** AA: conceptualization, funding acquisition, resources, supervision, data  
549 curation, formal analysis, visualization, methodology, writing of original draft. A.Molla: cell biology  
550 experiments, methodology, data curation. GN: molecular biology experiments, methodology, data  
551 curation. VEP: western blot experiments, methodology, formal analysis, data curation. FS: cell  
552 biology experiments, methodology, visualization, data curation. AC: data curation, methodology,  
553 writing–review and editing. CF: in-vivo and in-vitro experiments, methodology, data curation. MFL:  
554 in-vivo and in-vitro experiments, methodology, data curation. AMDG: data curation, resources,  
555 writing–review and editing. SC: Project administration, data curation, resources. A.Manca: NGS  
556 experiments, methodology, data analysis and curation. MCS: NGS experiments, data analysis and  
557 curation, methodology. MP: NGS experiments, methodology, data analysis and curation. TN: data  
558 analysis; FC: data analysis. SB: Nanostring experiments, methodology, data curation. G.Pruneri:  
559 resources, writing–review and editing. A.Maurichi: data curation, writing–review and editing. MS:  
560 data curation, writing–review and editing. MC: conceptualization, data analysis, writing–review  
561 and editing. G.Palmieri: conceptualization, funding acquisition, data curation, resources, formal  
562 analysis. MM: conceptualization, funding acquisition, data curation, resources, writing–review and  
563 editing. RM: conceptualization, supervision, data analysis and curation, writing of original draft.

564 **Acknowledgements.** The authors wish to tank the **EPigenetic Immune-oncology Consortium AIRC**  
565 **(EPICA)** investigators (Daniela Massi, Ulrich Pfeffer) for helpful discussion of data and critical  
566 review of the manuscript.

567

568

569

570

571

572

573

574

575

576

577

578

579

580

581

582

583

584

585

586

587

588



589 **References**

- 590 1. Hodi FS, O'Day SJ, McDermott DF, Weber RW, Sosman JA, Haanen JB, et al. Improved  
591 survival with ipilimumab in patients with metastatic melanoma. *N Engl J Med.*  
592 2010;363:711-23.
- 593 2. Twomey JD, Zhang B. Cancer immunotherapy update: FDA-approved checkpoint inhibitors  
594 and companion diagnostics. *AAPS J.* 2021;23:39.
- 595 3. Yang F, Markovic SN, Molina JR, Halfdanarson TR, Pagliaro LC, Chintakuntlawar AV, et al.  
596 Association of sex, age, and eastern cooperative oncology group performance status with  
597 survival benefit of cancer immunotherapy in randomized clinical trials a systematic review  
598 and meta-analysis. *JAMA Netw Open.* 2020;3:e2012534.
- 599 4. Sharma P, Hu-Lieskovan S, Wargo JA, Ribas A. Primary, adaptive, and acquired resistance to  
600 cancer immunotherapy. *Cell.* 2017;168:707-23.
- 601 5. Topper MJ, Vaz M, Marrone A, Brahmer JR, Baylin SB. The emerging role of epigenetic  
602 therapeutics in immuno-oncology. *Nat Rev Clin Oncol.* 2020;17:75-90.
- 603 6. Di Giacomo AM, Covre A, Finotello F, Rieder D, Danielli R, Sigalotti L, et al. Guadecitabine  
604 plus Ipilimumab in unresectable melanoma: the NIBIT-M4 clinical trial. *Clin Cancer Res.*  
605 2019;25:7351-362.
- 606 7. Aspeslagh S, Morel D, Soria JC, Postel-Vinay S. Epigenetic modifiers as new  
607 immunomodulatory therapies in solid tumours. *Ann Oncol.* 2018;29:812-24.
- 608 8. Jones PA, Ohtani H, Chakravarthy A, De Carvalho DD. Epigenetic therapy in immune-  
609 oncology. *Nat Rev Cancer.* 2019;19:151-61.
- 610 9. Ghoneim HE, Fan Y, Moustaki A, Abdelsamed HA, Dash P, Dogra P, et al. De novo  
611 epigenetic programs inhibit PD-1 blockade-mediated T cell rejuvenation. *Cell.*  
612 2017;170:142-57.

- 613 10. Chiappinelli KB, Strissel PL, Desrichard A, Li H, Henke C, Akman B, et al. Inhibiting DNA  
614 methylation causes an interferon response in cancer via dsRNA including endogenous  
615 retroviruses. *Cell*. 2015;162:974–86.
- 616 11. Falahat R, Berglund A, Putney RM, Perez-Villarroel P, Aoyama S, Pilon-Thomas S, et al.  
617 Epigenetic reprogramming of tumor cell–intrinsic STING function sculpts antigenicity and T  
618 cell recognition of melanoma. *Proc Natl Acad Sci USA*. 2021;118:1-9.
- 619 12. Luo N, Nixon MJ, Gonzalez-Ericsson PI, Sanchez V, Opalenik R, Li H, et al. DNA  
620 methyltransferase inhibition upregulates MHC-I to potentiate cytotoxic T lymphocyte  
621 responses in breast cancer. *Nat Commun*. 2018;9:248.
- 622 13. Topper MJ, Vaz M, Chiappinelli KB, DeStefano Shields CE, Niknafs N, Yen CR, et al.  
623 Epigenetic therapy ties MYC depletion to reversing immune evasion and treating lung  
624 cancer. *Cell*. 2017;171:1284–300.
- 625 14. Zheng H, Zhao W, Yan C, Watson CC, Massengill M, Xie M, et al. HDAC inhibitors enhance T-  
626 cell chemokine expression and augment response to PD-1 immunotherapy in lung  
627 adenocarcinoma. *Clin Cancer Res*. 2016;22:4119–32.
- 628 15. Xiaolei Li X, Su X, Liu R, Pan Y, Fang J, Cao L, et al. HDAC inhibition potentiates anti-tumor  
629 activity of macrophages and enhances anti-PD-L1-mediated tumor suppression. *Oncogene*.  
630 2021;40:1836–850.
- 631 16. Orillion A, Hashimoto A, Damayanti N, Shen L, Adelaiye-Ogala R, Arisa S, et al. Entinostat  
632 neutralizes myeloid-derived suppressor cells and enhances the antitumor effect of PD-1  
633 inhibition in murine models of lung and renal cell carcinoma. *Clin Cancer Res*.  
634 2017;23:5187–201.
- 635 17. Burr ML, Sparbier CE, Chan KL, Chan Y, Kersbergen A, Lam EYN, et al. An evolutionarily  
636 conserved function of polycomb silences the MHC class I antigen presentation pathway  
637 and enables immune evasion in cancer. *Cancer Cell*. 2019;36:385-401.

- 638 18. Zingg D, Arenas-Ramirez N, Sahin D, Rosalia RA, Antunes AT, Haeusel J, et al. The histone  
639 methyltransferase Ezh2 controls mechanisms of adaptive resistance to tumor  
640 immunotherapy. *Cell Rep.* 2017;20:854-67.
- 641 19. Hogg SJ, Vervoort SJ, Deswal S, Ott CJ, Li J, Cluse LA, et al. BET-Bromodomain inhibitors  
642 engage the host immune system and regulate expression of the immune checkpoint ligand  
643 PD-L1. *Cell Rep.* 2017;18:2162–174.
- 644 20. Kagoya Y, Nakatsugawa M, Yamashita Y, Ochi T, Guo T, Anczurowski M, et al. BET  
645 bromodomain inhibition enhances T cell persistence and function in adoptive  
646 immunotherapy models. *J Clin Invest.* 2016;126:3479–494.
- 647 21. Wang N, Wu R, Tang D, Kang R. The BET family in immunity and disease. *Signal Transduct*  
648 *Target Ther.* 2021;6:23.
- 649 22. Fazio C, Covre A, Cutaia O, Lofiego MF, Tunicci P, Chiarucci C, et al. Immunomodulatory  
650 properties of DNA hypomethylating agents: selecting the optimal epigenetic partner for  
651 cancer immunotherapy. *Front Pharmacol.* 2018;9:1443.
- 652 23. Perotti V, Baldassari P, Molla A, Nicolini G, Bersani I, Grazia G, et al. An actionable axis  
653 linking NFATc2 to EZH2 controls the EMT-like program of melanoma cells. *Oncogene.*  
654 2019;38:4384-396.
- 655 24. Sigalotti L, Coral S, Altomonte M, Natali L, Gaudino G, Cacciotti P, et al. Cancer testis  
656 antigens expression in mesothelioma: role of DNA methylation and bioimmunotherapeutic  
657 implications. *Br J Cancer.* 2002;86:979–82.
- 658 25. Grazia G, Vegetti C, Benigni F, Penna I, Perotti V, Tassi E, et al. Synergistic anti-tumor  
659 activity and inhibition of angiogenesis by cotargeting of oncogenic and death receptor  
660 pathways in human melanoma. *Cell Death Dis.* 2014;5:e1434.

- 661 26. Cheng Y, He C, Wang M, Ma X, Mo F, Yang S, et al. Targeting epigenetic regulators for  
662 cancer therapy: mechanisms and advances in clinical trials. *Signal Transduct Target Ther.*  
663 2019;4:62.
- 664 27. Lagonigro MS, De Cecco L, Carninci P, Di Stasi D, Ranzani T, Rodolfo M, et al. CTAB-urea  
665 method purifies RNA from melanin for cDNA microarray analysis. *Pigment Cell Res.*  
666 2004;17:312-15.
- 667 28. Coral S, Sigalotti L, Colizzi F, Spessotto A, Nardi G, Cortini E, et al. Phenotypic and functional  
668 changes of human melanoma xenografts induced by DNA hypomethylation:  
669 Immunotherapeutic implications. *J Cell Physiol.* 2006;207:58-66.
- 670 29. Covre A, Coral S, Di Giacomo AM, Taverna P, Azab M, Maio M. Epigenetics meets immune  
671 checkpoints. *Semin in Oncol.* 2015;42:506-13.
- 672 30. Martin B, Chadwick W, Yi T, Park S, Lu D, Ni B, et al. VENNTURE—a novel venn diagram  
673 investigational tool for multiple pharmacological dataset analysis. *Plos One.*  
674 2012;7:e36911.
- 675 31. Dobin A, Davis CA, Schlesinger F, Drenkow J, Zaleski C, Jha S, et al. STAR: ultrafast  
676 universal RNA-seq aligner. *Bioinformatics.* 2013;29:15–21.
- 677 32. Liao Y, Smyth GK, Shi W. FeatureCounts: an efficient general purpose program for assigning  
678 sequence reads to genomic features. *Bioinformatics.* 2013;30:923-30.
- 679 33. Risso D, Schwartz K, Sherlock G, Dudoit S. GC-Content Normalization for RNA-Seq Data.  
680 *BMC Bioinformatics.* 2011;12:480.
- 681 34. Robinson MD, McCarthy DJ, Smyth GK. EdgeR: a Bioconductor package for differential  
682 expression analysis of digital gene expression data. *Bioinformatics.* 2010;26:139-40.
- 683 35. Yu G, Wang L, Han Y, He Q. ClusterProfiler: an R package for comparing biological themes  
684 among gene clusters. *OMICS.* 2012;16:284-7.

- 685 36. Tsoi J, Robert L, Paraiso L, Galvan C, Sheu KM, Lay J, et al. Multi-stage differentiation  
686 defines melanoma subtypes with differential vulnerability to drug-induced iron-dependent  
687 oxidative stress. *Cancer Cell*. 2018;33:890-904.
- 688 37. Schaer DA, Beckmann RP, Dempsey JA, Huber L, Forest A, Amaladas N, et al. The CDK4/6  
689 inhibitor abemaciclib induces a T Cell inflamed tumor microenvironment and enhances the  
690 efficacy of PD-L1 checkpoint blockade. *Cell Rep*. 2018;22:2978–994.
- 691 38. Alqahtani A, Choucair K, Ashraf M, Hammouda DM, Alloghbi A, Khan T, et al. Bromodomain  
692 and extra-terminal motif inhibitors: a review of preclinical and clinical advances in cancer  
693 therapy. *Future Sci OA*. 2019;5:FSO372.
- 694 39. Griffiths EA, Choy G, Redkar S, Taverna P, Azab M, Karpf AR. SGI-110: DNA  
695 methyltransferase inhibitor oncolytic. *Drugs Future*. 2013;38:535–43.
- 696 40. Rajapakse VN, Luna A, Yamade M, Loman L, Varma S, Sunshine M, et al. CellMinerCDB for  
697 integrative cross-database genomics and pharmacogenomics analyses of cancer cell lines.  
698 *iScience*. 2018;10:247–64.
- 699 41. Hofmann O, Caballero OL, Stevenson BJ, Chen Y, Cohen T, Chua R, et al. Genome-wide  
700 analysis of cancer/testis gene expression. *Proc Natl Acad Sci USA*. 2008;105:20422-27.
- 701 42. Liu M, Zhang L, Li H, Hinoue T, Zhou W, Ohtani H, et al. Integrative epigenetic analysis  
702 reveals therapeutic targets to the DNA methyltransferase inhibitor SGI-110 in  
703 hepatocellular carcinoma. *Hepatol*. 2018;68:1412–428.
- 704 43. Subramanian A, Tamayo P, Mootha VK, Mukherjee S, Ebert BL, Gillette MA, et al. Gene set  
705 enrichment analysis: a knowledge-based approach for interpreting genome-wide  
706 expression profiles. *Proc Natl Acad Sci USA*. 2005;102:15545-50.
- 707 44. Ji R, Chasalow SD, Wang L, Hamid O, Schmidt H, Cogswell J, et al. An immune-active tumor  
708 microenvironment favors clinical response to ipilimumab. *Cancer Immunol Immunother*.  
709 2012;61:1019-31.

- 710 45. Hamid O, Schmidt H, Ridolfi L, Aamdal S, Hansson J, Guida M, et al. A prospective phase II  
711 trial exploring the association between tumor microenvironment biomarkers and clinical  
712 activity of ipilimumab in advanced melanoma. *J Transl Med.* 2011;9:204.
- 713 46. Gibbons HR, Mi DJ, Farley VM, Esmond T, Kaood MB, Aune TM. Bromodomain inhibitor  
714 JQ1 reversibly blocks IFN- $\gamma$  production. *Sci Rep.* 2019;9:10280.
- 715 47. Gonzales-Zulueta M, Bender CM, Yang AS, Nguyen T, Beart RW, Van Tornout JM, et al.  
716 Methylation of the 5' CpG island of the p16/CDKN2 tumor suppressor gene in normal and  
717 transformed human tissues correlates with gene silencing. *Cancer Res.* 1995;55:4531-35.
- 718 48. Xu WS, Parmigiani RB, Marks PA. Histone deacetylase inhibitors: molecular mechanisms of  
719 action. *Oncogene.* 2007;26:5541–52.
- 720 49. Shi J, Vakoc CR. The mechanisms behind the therapeutic activity of BET bromodomain  
721 inhibition. *Mol Cell.* 2014;54:728-36.
- 722 50. Liao Y, Chen C, Shah N, Xiao T, Feit A, Yang M, et al. A non-canonical EZH2 function  
723 sensitizes solid tumors to genotoxic stress. *bioRxiv.* preprint doi:  
724 <https://doi.org/10.1101/2020.09.11.291534>.

725

726

727

728

729

730

731 **Figure legends.**

732 **Figure 1. Landscape of gene modulation by epigenetic drugs in melanoma cell lines.** Each  
733 pie chart shows the % of genes significantly modulated in each of 20 families or functional groups  
734 (red=upregulated genes, green=downregulated genes) by each drug in the two cell lines (VRG100  
735 and CST30), on the basis of FC and p value. The 20 gene families are further classified into 7  
736 groups identified on the right hand side of the figure: 1, epigenetic regulation; 2, proliferation; 3,  
737 immune regulation; 4, enzymes; 5, structural components; 6, adhesion; 7, differentiation.

738 **Figure 2. Immune-related gene modulation by epigenetic drugs in melanoma.**

739 Modulation of 731 genes was assessed by the Nanostring Cancer Immune panel upon treatment  
740 with 4 epigenetic drugs and with Abemaciclib of ten melanoma cell lines with the indicated  
741 mutational and differentiation profiles (as defined in Tables S1 and Fig. S2, respectively). Genes in  
742 the Nanostring panel were grouped into 21 functional classes (as described in Fig. S7). The overall  
743 modulatory activity of all drugs on each gene class was visualized by *ad-hoc* developed, color-  
744 coded metrics described at the bottom of the Figure. The first metric adopts a red/green color  
745 code to visualize instances of predominant up- or down-regulation of genes by each drug and in  
746 each cell line. This metric contains a normalization factor ( $=(\%UP+\%DN)/100$ ) that takes into  
747 account the different number of genes modulated in each cell line. The second metrics adopts  
748 shades of blue to visualize instances where an equal fraction of up- and down-modulated genes in  
749 each class was observed. Up- or down-modulation of each gene by any drug was defined on the  
750 basis of a Treated/Control ratio  $>|1.5|$ . \*: these two cell lines were treated with decitabine, the  
751 active metabolite of guadecitabine.

752 **Figure 3. Quantitative western blot analysis for modulation of immune-related proteins**

753 **in melanoma cell lines by epigenetic drugs.** Eleven melanoma cell lines were treated with  
754 guadecitabine (GUA), givinostat (GIV), JQ1, OTX-015 (OTX), GSK-126 (GSK) and abemaciclib

755 (ABEMA) and assessed for expression/modulation of 14 proteins. Modulation of each protein by  
756 drug treatment, based on data analysis and visualization approach described in Fig. S15 and S16, is  
757 visualized by a color code shown at the bottom of the figure. Grey boxes: the antigen was not  
758 expressed and not induced by treatments.

759 **Figure 4. Guadecitabine is an activator of innate immunity and inflammation pathways.**

760 **A.** Upstream Regulators predicted to be activated (Z score >2, p value <0.05, left graph) or  
761 inhibited (Z score <-2, p value <0.05, right graph), in at least 6/10 cell lines. **B.** Upstream Regulators  
762 predicted to be activated (Z score >2, p value <0.05) in 5/10 cell lines. Data in A and B based on IPA  
763 analysis of Nanostring gene modulation data. Color-coded arrows define the biological  
764 function/pathway of each UR. Each black dot in the two graphs represents the Z score value of the  
765 indicated URs, computed for a single cell line.

766 **Figure 5. Comparison of Upstream Regulators activated by guadecitabine in melanoma vs**

767 **mesothelioma and in melanoma vs hepatocarcinoma cell lines. A, B.** Scatter plot of URs  
768 activated by guadecitabine in melanoma vs mesothelioma (A) and in melanoma vs  
769 hepatocarcinoma cell lines (B, according to gene expression data retrieved from ref. 42).  
770 Guadecitabine UR signature molecules shown in this figure are highlighted with the same color  
771 code used in Fig. 4 to mark the biological function/pathway. \*: identity of URs shown in the square  
772 in panel A.

773 **Figure 6. Expression and modulation of guadecitabine-specific signature genes in baseline**

774 **and on-treatment clinical samples from NIBIT-M4 patients. A.** Heatmap of log<sub>2</sub> fold changes of  
775 guadecitabine signature genes among the following comparisons: w4 vs. w0, w12 vs. w4 and w12  
776 vs w0. **B-D.** Enrichment plots containing profiles of the running enrichment scores (ES) and  
777 positions of guadecitabine gene set members on the rank ordered list in GSEA for w4 vs. w0 (B),  
778 w12 vs. w4 (C) and w12 vs. w0 (D) comparisons.



779

780 **Figure 7. Activation of guadecitabine-specific UR signature molecules in on-treatment**  
781 **tumor biopsies from responding compared to non-responding patients in the NIBIT-M4 trial. A,**  
782 **B. Z score values of guadecitabine-activated URs as identified in Fig. 4A (A) or in Fig. 4B (B) based**  
783 **on differential gene expression analysis in tumor samples (obtained at w0, w4 and w12) from**  
784 **responding (n=3) vs non-responding patients (n=5). Only significant URs (Z score >2) are shown by**  
785 **the indicated color code. C. Scatter plot of Z score values of activated URs in responding vs non-**  
786 **responding patients at w4 vs. wk12.**

Figure 1

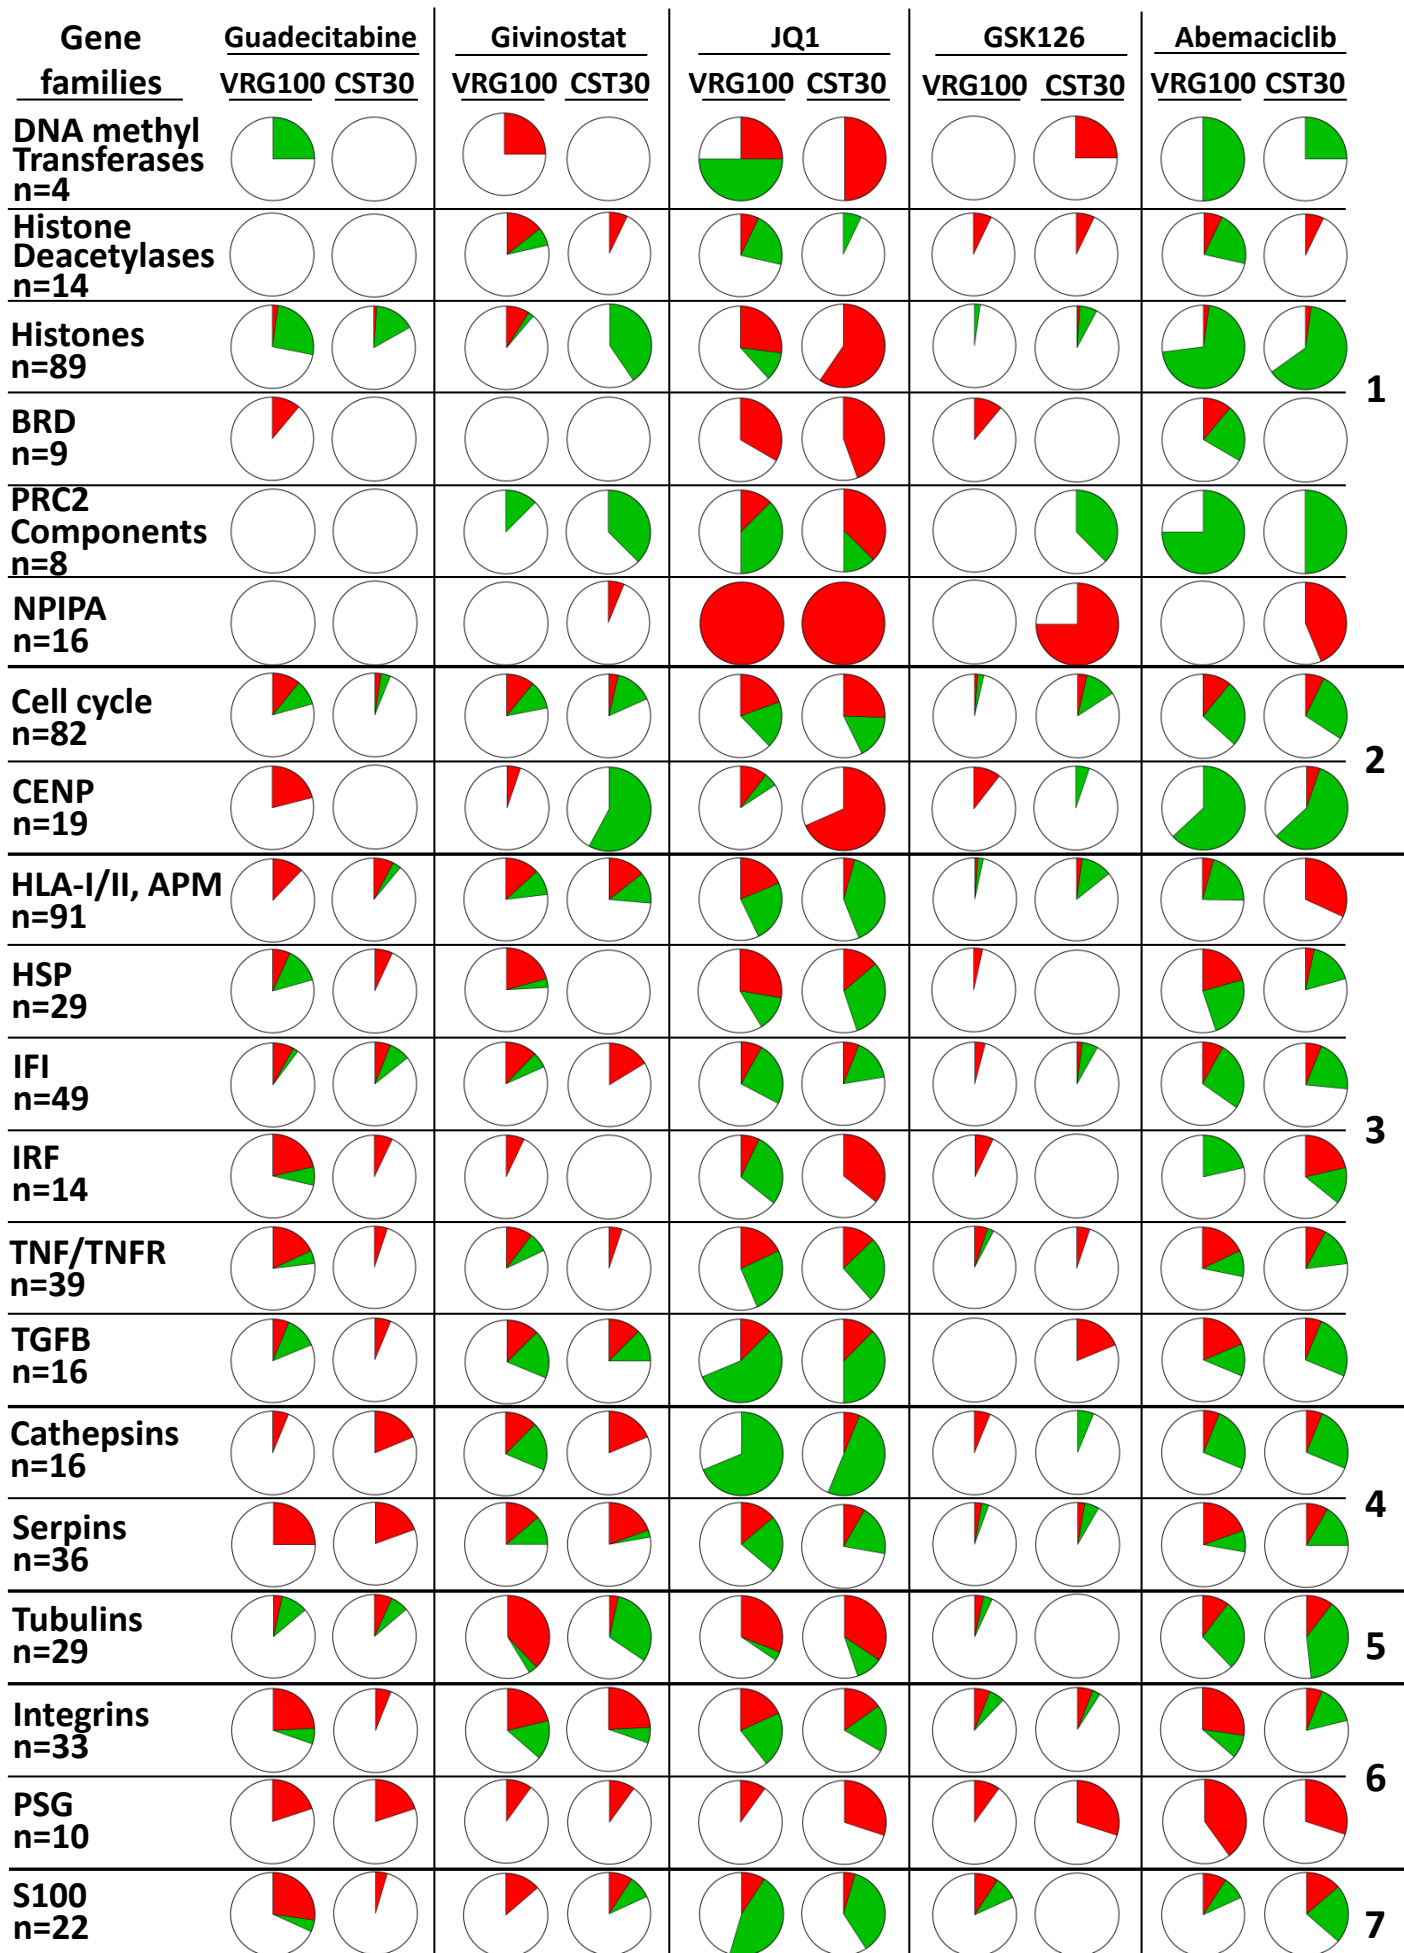

Figure 2

EPIGENETIC DRUGS

UNRELATED DRUG

GUADECITABINE  
(DNMT inhibitor)

GIVINOSTAT  
(HDAC Inhibitor)

JQ1  
(BET inhibitor)

GSK-126  
(EZH2 Inhibitor)

ABEMACICLIB  
(CDK4/6 Inhibitor)

Cell lines →

VRG100  
BRM17  
FRN39  
CST30  
BNV13  
MINT59  
GRD43  
GML41  
CPN20  
SLN91

VRG100  
BRM17  
FRN39  
CST30  
BNV13  
MINT59  
GRD43  
GML41  
CPN20  
SLN91

VRG100  
BRM17  
FRN39  
CST30  
BNV13  
MINT59  
GRD43  
GML41  
CPN20  
SLN91

VRG100  
BRM17  
FRN39  
CST30  
BNV13  
MINT59  
GRD43  
GML41  
CPN20  
SLN91

VRG100  
BRM17  
CST30  
MINT59  
GML41  
CPN20  
SLN91

Mutational Subset →

NRAS  
BRAF  
WT  
BRAF  
BRAF  
NRAS  
BRAF  
BRAF  
NRAS  
BRAF

NRAS  
BRAF  
WT  
BRAF  
BRAF  
NRAS  
BRAF  
BRAF  
NRAS  
BRAF

NRAS  
BRAF  
WT  
BRAF  
BRAF  
NRAS  
BRAF  
BRAF  
NRAS  
BRAF

NRAS  
BRAF  
WT  
BRAF  
BRAF  
NRAS  
BRAF  
BRAF  
NRAS  
BRAF

NRAS  
BRAF  
BRAF  
NRAS  
BRAF  
BRAF

Predominant differentiation phenotype →

UND/NCL  
UND/NCL  
NCL/TRANS  
NCL/TRANS  
TRANS/MEL  
MEL  
MEL  
MEL  
MIXED  
MIXED

UND/NCL  
UND/NCL  
NCL/TRANS  
NCL/TRANS  
TRANS/MEL  
MEL  
MEL  
MEL  
MIXED  
MIXED

UND/NCL  
UND/NCL  
NCL/TRANS  
NCL/TRANS  
TRANS/MEL  
MEL  
MEL  
MEL  
MIXED  
MIXED

UND/NCL  
UND/NCL  
NCL/TRANS  
NCL/TRANS  
TRANS/MEL  
MEL  
MEL  
MEL  
MIXED  
MIXED

UND/NCL  
UND/NCL  
NCL/TRANS  
MEL  
MEL  
MIXED  
MIXED

Functional class

# Genes

\* \*

|                                              |    |
|----------------------------------------------|----|
| CANCER TESTIS ANTIGENS                       | 31 |
| ADHESION MOLECULES                           | 49 |
| POSITIVE / NEGATIVE COSTIMULATION            | 18 |
| MYELOID-RELATED GENES                        | 25 |
| CYTOKINES AND RECEPTORS                      | 89 |
| T / NK-RELATED GENES                         | 46 |
| IMMUNE CELLS LINEAGE/DIFFERENTIATION MARKERS | 46 |
| REGULATION OF INFLAMMATION                   | 41 |
| TNF / TNFR PATHWAY                           | 36 |
| TYPE I-II-III IFN PATHWAYS                   | 25 |
| INTRACELLULAR SIGNALING                      | 46 |
| TRANSCRIPTIONAL REGULATION                   | 50 |
| TLR PATHWAY                                  | 19 |
| HLA CLASS I / II AND ANTIGEN PRESENTATION    | 37 |
| COMPLEMENT PATHWAY                           | 30 |
| CHEMOKINES AND RECEPTORS                     | 59 |
| SURVIVAL / APOPTOSIS                         | 27 |
| IMMUNE SUPPRESSION                           | 4  |
| TGFβ PATHWAY                                 | 6  |
| GROWTH FACTORS AND RECEPTORS                 | 6  |
| UNCLASSIFIED                                 | 41 |

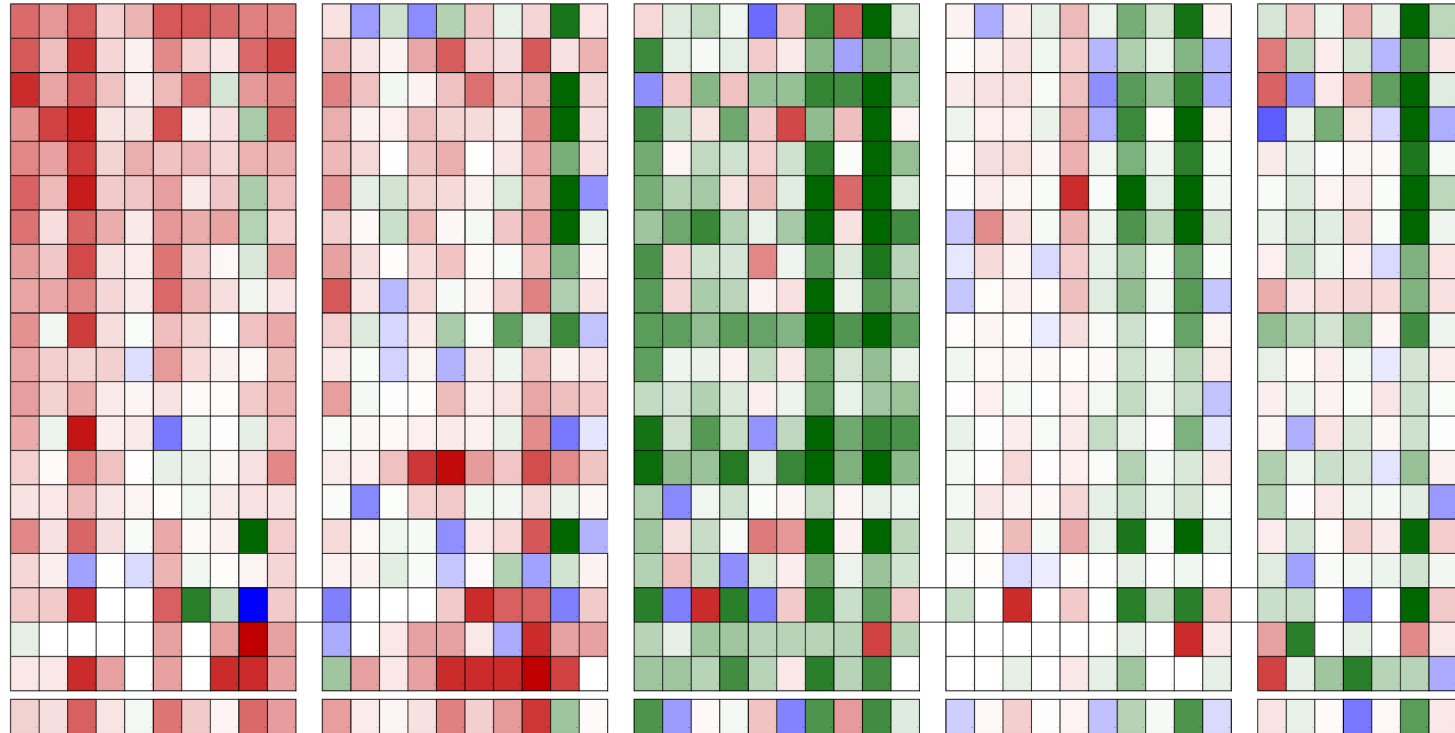

$$(\% \text{ UP} - \% \text{ DN}) \times [(\% \text{ UP} + \% \text{ DN}) / 100]$$

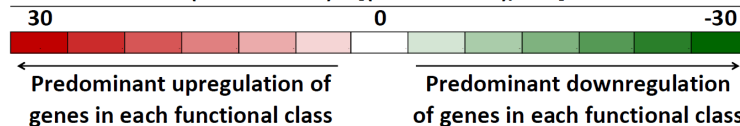

$$\% \text{ UP} + \% \text{ DN}$$

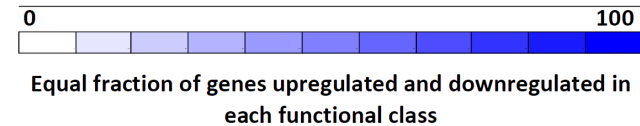



A

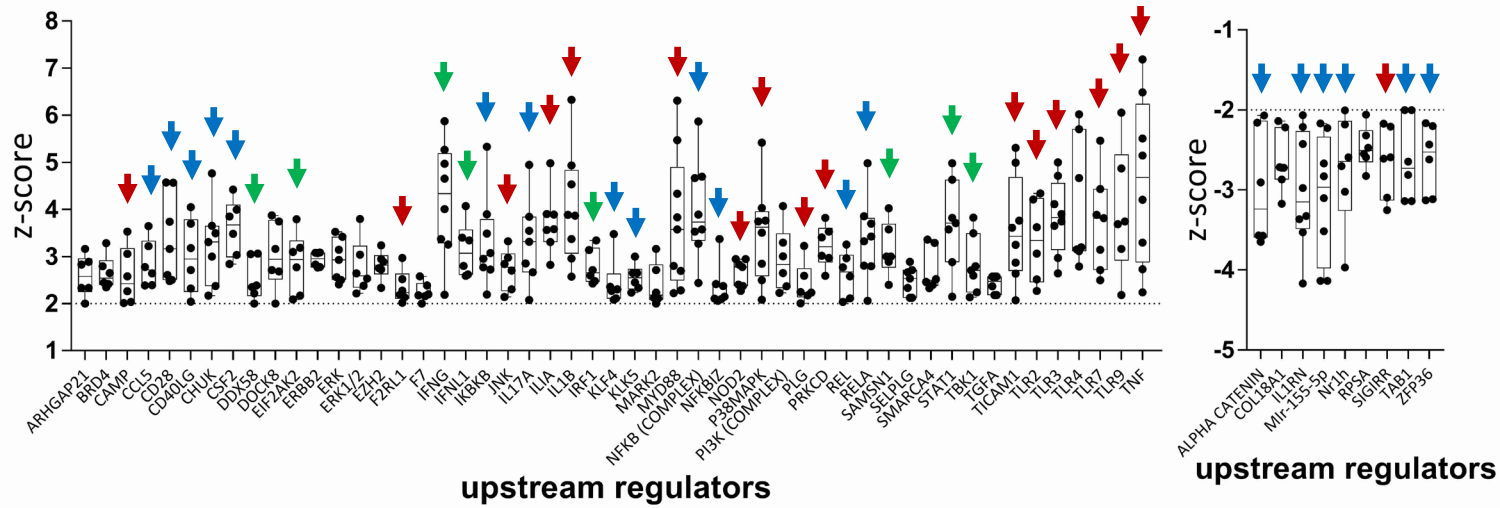

B

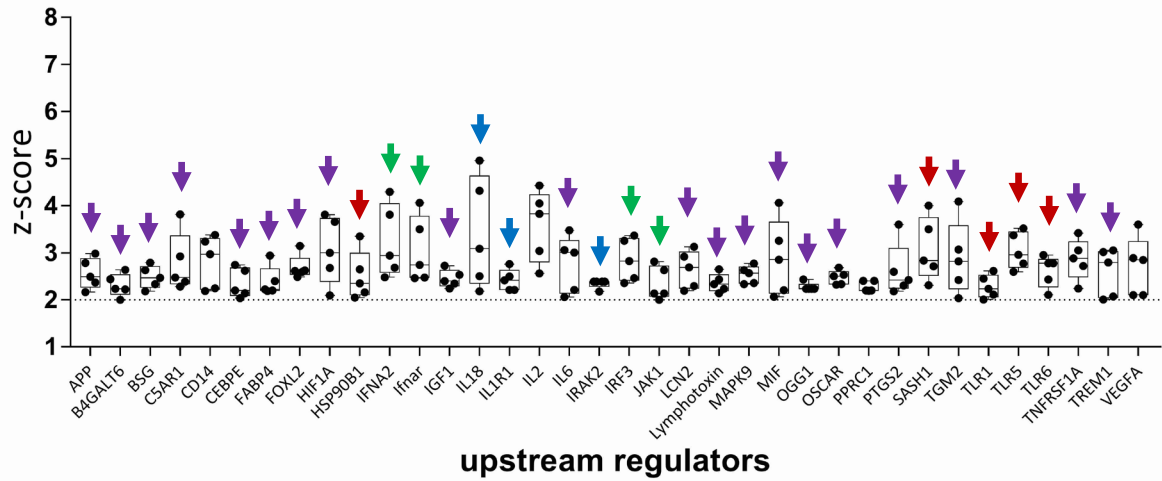

↓: TLR pathway 
 ↓: NF-kb pathway 
 ↓: Type I-II-III IFN pathway 
 ↓: Inflammation

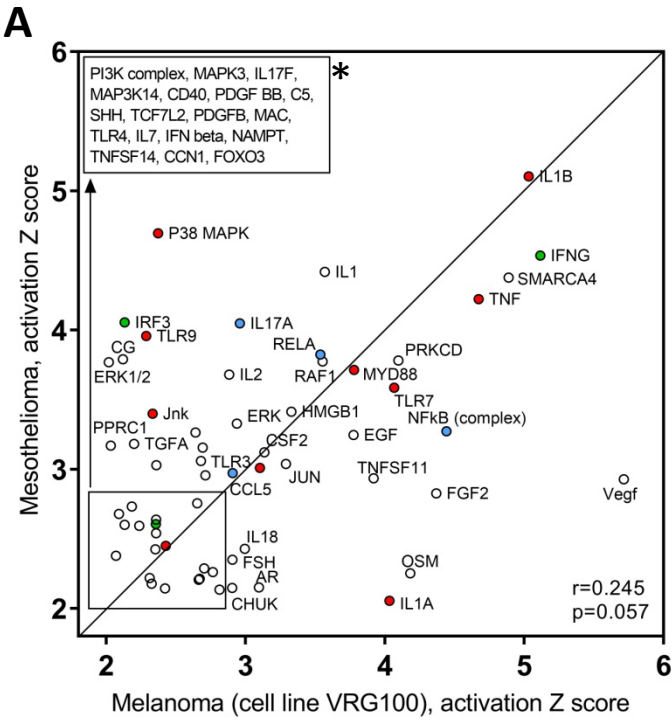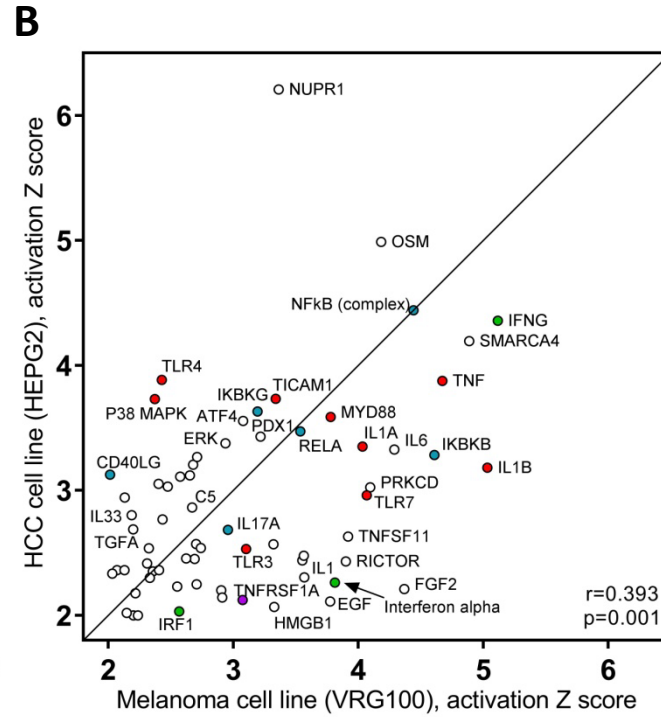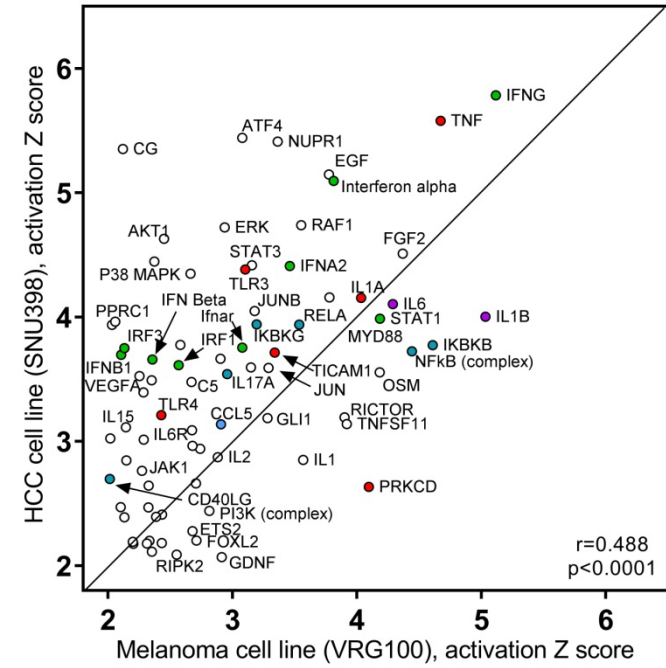

Figure 6

A

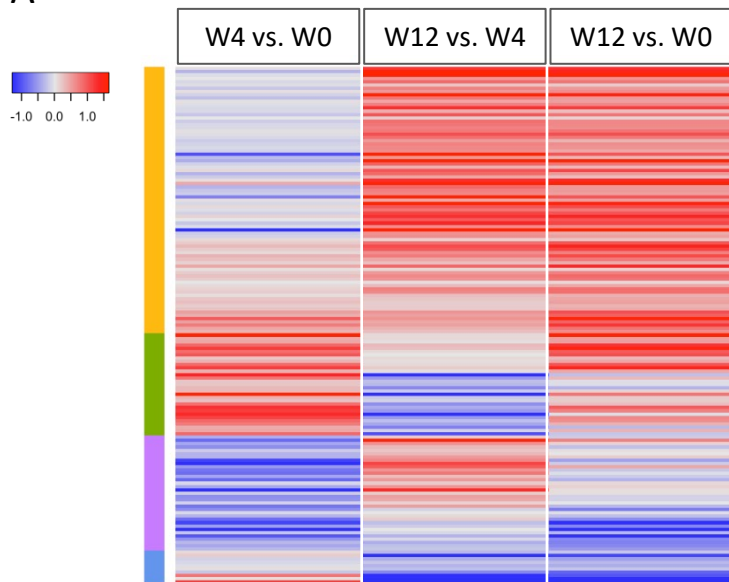

C

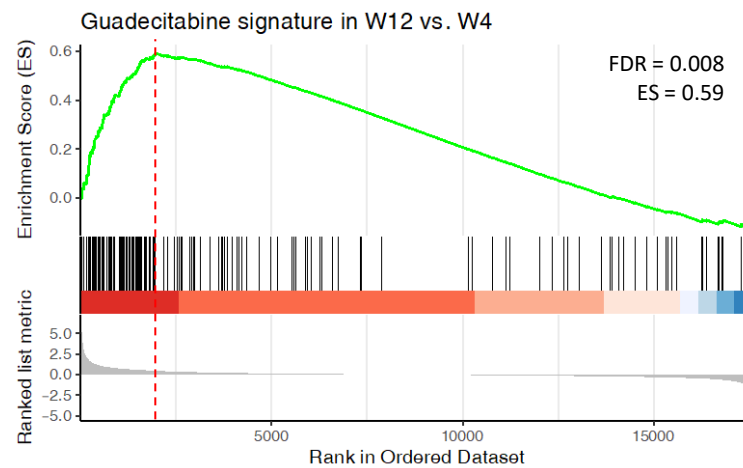

B

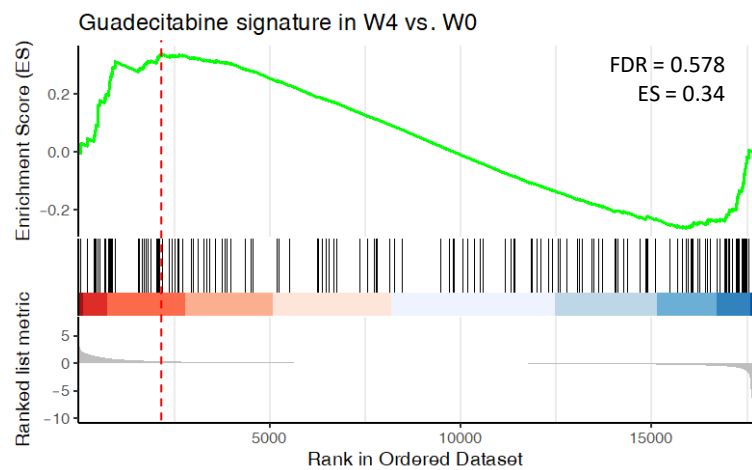

D

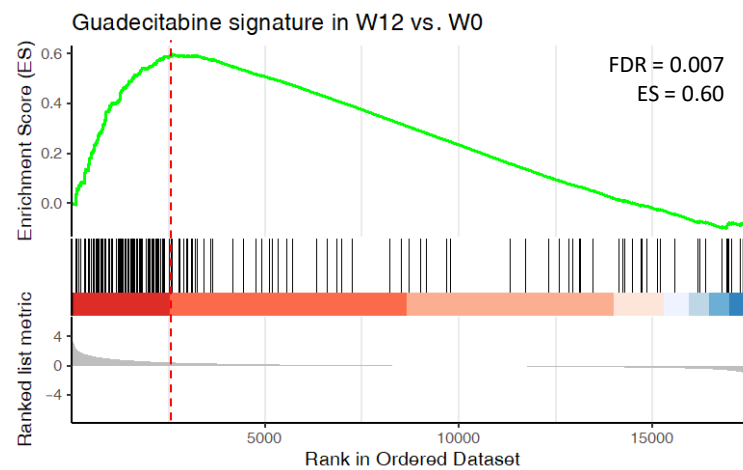

Figure 7

**A**

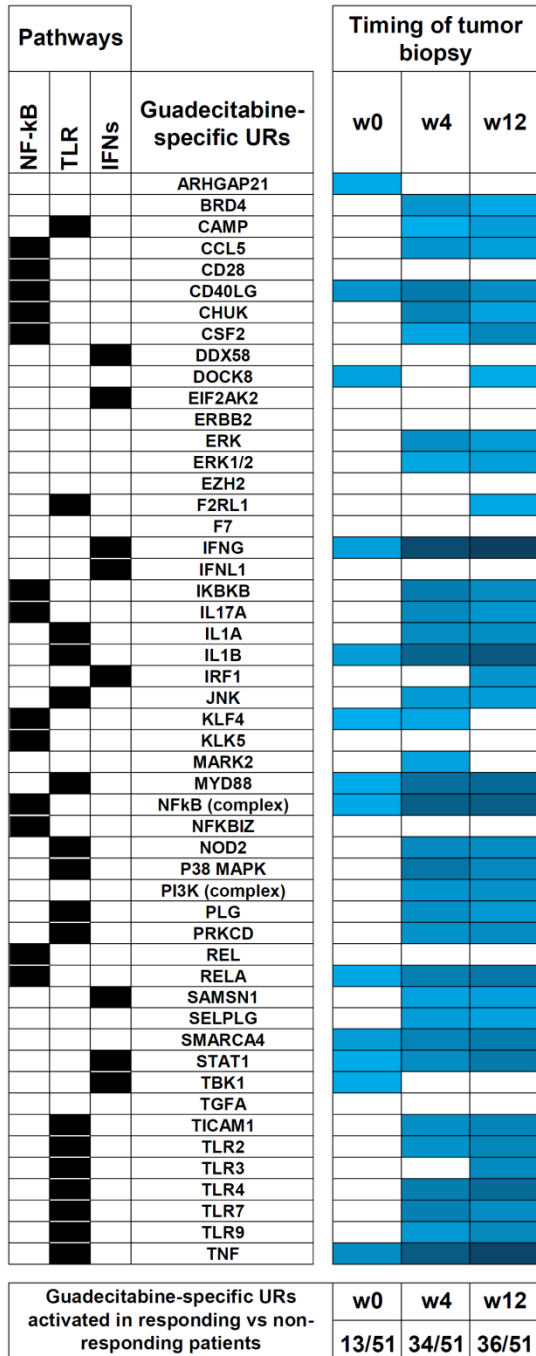

**B**

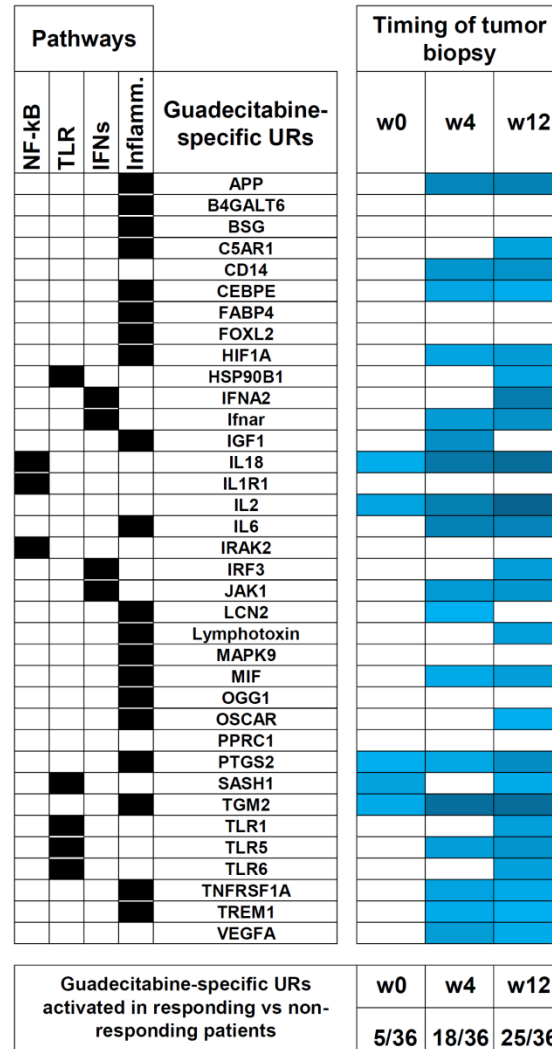

**C**

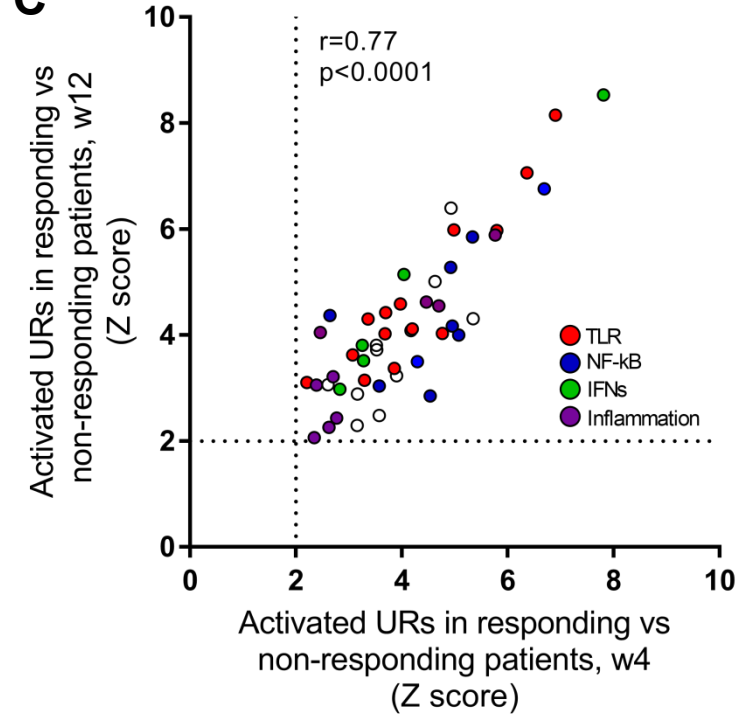

Activation Z score values

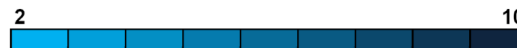

Source: https://www.biorxiv.org/content/10.1101/2022.04.13.488140v1.full.pdf
